# Supplementary material
Source: publisher figshare collection journal article supplement (https://tandf.figshare.com/ndownloader/files/16781915)
Supplement: Supplementary file 1 [file 16781915]

**Supplementary Information 1.** Growth-promoting effects of rhizobacteria isolates on the growth of gibberellin-defective and normal rice cultivars.

| **Treatment** | ***Waito-C* (gibberellin-defective)** | | | **Whayoungbeyo (normal)** | | |
| --- | --- | --- | --- | --- | --- | --- |
| **Length (cm)** | **Dry weight (g)** | **Chlorophyll (SPAD)** | **Length (cm)** | **Dry weight (g)** | **Chlorophyll (SPAD)** |
| Control 1 | 6.91±0.29cd | 0.10±0.01bcd | 28.07±0.58b | 8.28±0.78b | 0.20±0.03b | 29.80±0.44ab |
| Control 2 | 6.97±0.16cd | 0.10±0.02ab | 29.23±0.70b | 8.17±0.17b | 0.20±0.02bc | 29.27±1.07abc |
| SSB01 | 6.78±0.28d | 0.11±0.01b | 28.17±0.80b | 8.62±0.58b | 0.19±0.02b | 29.97±0.61abc |
| SSB07 | 7.91±0.26a | 0.14±0.01a | 29.77±0.45a | 10.07±0.18a | 0.23±0.02a | 32.03±0.05a |
| SRB01 | 6.80±0.33d | 0.10±0.01b | 27.03±1.29b | 8.50±0.61b | 0.15±0.04bc | 29.03±0.64bc |
| SRB14 | 6.74±0.28d | 0.11±0.01b | 27.40±0.26b | 8.49±0.50b | 0.15±0.05bc | 29.47±1.10c |
| SFB16 | 7.16±0.39bc | 0.11±0.01b | 28.50±0.53b | 8.56±0.48b | 0.17±0.02bc | 29.63±0.76bc |
| SFB31 | 7.41±0.21b | 0.12±0.01b | 29.20±1.21b | 8.50±0.30b | 0.15±0.01c | 28.30±0.92bc |

Values represent means ± SD (*n*=3), and different letters indicate significant differences (*p* ≤ 0.05), as assessed by the Duncan Multiple Range Test (SAS 9.0). Control 1 = water; Control 2 = sterilised LB media.

SSB01=Staphylococcus sp. CS001 (KY285285); SSB07= Bacillus tequilensis (KP860637); SRB01=Pseudomonas sp. CS39-8 (KY285286); SRB14=Planococcus sp. CS083 (KY287939); SFB16=Fictibacillus sp. CS55-1 (KY287943); and SFB31=Streptomyces sp. CS70-1 (KY287942)."
